# Supplementary material
Source: PubMed Central journal article supplement (PMC3093986)
Supplement: supp_108.075358_biolreprod.108.075358-1.pdf [file supp_108.075358_biolreprod.108.075358-1.pdf]

Schmidt et al., SUPPLEMENTAL TABLE S1. Sequences of primers used for qRT-PCR.

| Gene <sup>a</sup> | Forward Primer (5'-3') | Reverse Primer (5'-3') |
|-------------------|------------------------|------------------------|
| <i>Bcl6b</i>      | CATTTTCGGCACAAGAGTCA   | TTAGATGGTGGGGACTCAGC   |
| <i>Bhlhe40</i>    | GACCGGATTAACGAGTGCAT   | TCAATGCTTTCACGTGCTTC   |
| <i>Cd97</i>       | GCCAGGCTCTGTTGAGTTTC   | AGCCTCGATGAGTTTCTGGA   |
| <i>Egr3</i>       | TTTGCCTGTGAGTTCTGTGG   | CCCCTTTCTCCGACTTCTTC   |
| <i>Etv5</i>       | TGAGAGGGGACCGAGTTATG   | CTTCCCTATGGGTGTGCACT   |
| <i>Gbp2</i>       | CTCGACTGTGCATCAGGAAA   | TGCAGAGTTGCTTCCTCAGA   |
| <i>Hoxc4</i>      | TAAACAAACAAGCCCCCTTGC  | CCAATGGCCTTAAAAGCAAA   |
| <i>Ldlr</i>       | GGATGATGTGGCATGAACAG   | GTGAGAAAGCGTCCTTCTCG   |
| <i>Nanog</i>      | GGTGAAGACCTGGTTCCAAA   | AGGCCGTTGCTAGTCTTCAA   |
| <i>Pou5f1</i>     | AGAACCGTGTGAGGTGGAAC   | CACCTCGAACCACATCCCCTCT |
| <i>Rps2</i>       | TACCTGACCCCTGACCTCTG   | TGGTGTGGGTTTTCAACAAGA  |
| <i>Sox2</i>       | ATTACCCGCGAGCAAAATGAC  | CTAGTCGGCATCACGGTTTTT  |
| <i>Tcfap2c</i>    | CTGAGAACCTAGGGCTGCAC   | GGTCCTTTGCGAATGACAGT   |
| <i>Tec</i>        | GCCTTCGTTTGAAGACTTGC   | TTTCTTCTCTTGCCCTTGGA   |

<sup>a</sup>*Bcl6b* (previously known as *Bazf*, B-cell CLL/lymphoma 6, member B (zinc finger protein)), *Bhlhe40* (previously known as *Bhlhb2*, basic helix-loop-helix family, member e40), *Cd97* (CD 97 molecule), *Egr3* (early growth response 3), *Etv5* (previously known as *Erm*, ets variant 5), *Gbp2* (guanylate binding protein 2), *Hoxc4* (homeobox C4), *Ldlr* (low density lipoprotein receptor), *Nanog* (nanog homeobox), *Pou5f1* (previously known as *Oct4*, POU class 5 homeobox 1), *Rps2* (ribosomal protein S2), *Sox2* (SRY (sex determining region Y)-box 2), *Tcfap2c* (transcription factor AP-2, gamma), *Tec* (tec protein tyrosine kinase).

Schmidt et al., SUPPLEMENTAL TABLE S2. siRNAs used for functional analysis of gene activity.

| Gene <sup>a</sup> | Company   | Species <sup>b</sup> | Product no.      | Knockdown (%) <sup>c</sup> |
|-------------------|-----------|----------------------|------------------|----------------------------|
| <i>Bcl6b</i>      | Dharmacon | M, NM_007528         | M-043010-00-0005 | 37.2                       |
| <i>Bhlhe40</i>    | Ambion    | R, NM_053328         | AM16708, 195437  | 48.5                       |
|                   | Dharmacon | R, NM_053328         | M-091915-00-0010 | 54.8                       |
| <i>Etv5</i>       | Dharmacon | R, XM_221387         | M-087219-00-0010 | 42.9                       |
| <i>Hoxc4</i>      | Ambion    | M, NM_013553         | AM16708, 159290  | 60.6                       |
|                   | Dharmacon | R, XM_347337         | M-082152-00-0010 | 41.8                       |
| <i>Tec</i>        | Ambion    | M, NM_013689         | AM16708, 188351  | 50.8                       |
|                   | Dharmacon | R, XM_341208         | M-084511-00-0010 | 48.2                       |
| Neg. Control      | Ambion    |                      | 4611             |                            |

<sup>a</sup>*Bcl6b* (previously known as *Bazf*, B-cell CLL/lymphoma 6, member B zinc finger protein), *Bhlhe40* previously known as *Bhlhb2*, basic helix-loop-helix family, member e40), *Etv5* (previously known as *Erm*, ets variant 5), *Hoxc4* (homeobox C4), *Tec* (tec protein tyrosine kinase).

<sup>b</sup>Accession number of the gene utilized to develop the particular siRNA for either mouse (M) or rat (R) genes.

<sup>c</sup>Percent knockdown of the gene of interest by the specific siRNA compared to negative control siRNA in long-term cultures of self-renewing rat SSCs.

Schmidt et al., SUPPLEMENTAL TABLE S3. Numbers of genes present and GDNF-regulated in cultures of rat EPCAM+ clump forming germ cells.

| Gene expression                                                                                                                         | Number |
|-----------------------------------------------------------------------------------------------------------------------------------------|--------|
| Total expressed by Rat EPCAM+ clump forming germ cells                                                                                  | 21,271 |
| Total GDNF-regulated                                                                                                                    | 7,948  |
| Total up-regulated by GDNF                                                                                                              | 3,741  |
| Total down-regulated by GDNF                                                                                                            | 4,207  |
| Total up-regulated between control and 18 h GDNF withdrawal 2-fold or greater                                                           | 113    |
| Total down-regulated between control and 18 h GDNF withdrawal 2-fold or greater                                                         | 24     |
| Total up-regulated between control and 18 h GDNF withdrawal 2-fold or greater that recovered 2-fold or greater after GDNF replacement   | 61     |
| Total down-regulated between control and 18 h GDNF withdrawal 2-fold or greater that recovered 2-fold or greater after GDNF replacement | 16     |

Schmidt et al., SUPPLEMENTAL TABLE S4. Functional clustering of GDNF-regulated genes.

| Cluster                                                                               | No. of genes | P value  | Fold Enrichment |
|---------------------------------------------------------------------------------------|--------------|----------|-----------------|
| Genes up-regulated 2-fold between control and 18h GDNF withdrawal <sup>a</sup>        |              |          |                 |
| Extracellular Space                                                                   | 20           | 0.0001   | 2.5             |
| Plasma Membrane                                                                       | 19           | 0.00045  | 2.3             |
| Ion Binding                                                                           | 17           | 0.0073   | 2.0             |
| Cation Binding                                                                        | 15           | 0.0089   | 2.1             |
| Metal Binding                                                                         | 12           | 0.002    | 2.8             |
| Calcium Ion Binding                                                                   | 10           | 0.0071   | 4.0             |
| Genes up-regulated 2-fold between any time point and 18h GDNF withdrawal <sup>a</sup> |              |          |                 |
| DNA Binding                                                                           | 33           | 0.00017  | 2.0             |
| Transcription Regulation                                                              | 31           | 0.000023 | 2.3             |
| Morphogenesis                                                                         | 29           | 0.000025 | 2.4             |
| Cell Differentiation                                                                  | 25           | 0.00021  | 2.3             |
| Nuclear Protein                                                                       | 25           | 0.0012   | 2.0             |
| Metal Binding                                                                         | 23           | 0.001    | 2.1             |
| Zinc Interacting                                                                      | 17           | 0.0025   | 2.3             |
| Cell Motility                                                                         | 14           | 0.000574 | 3.1             |
| Lipid Metabolism                                                                      | 12           | 0.04     | 2               |
| Cell Cycle Regulation                                                                 | 11           | 0.016    | 2.4             |
| Calcium Ion Binding                                                                   | 10           | 0.047    | 2.1             |

<sup>a</sup>Clusters listed had 10 or more genes per functional group, and a p-value and fold change of  $\leq 0.05$  and  $\geq 2$  for enrichment compared to background.

Schmidt et al., SUPPLEMENTAL TABLE S5. Expression of genes that have been reported to be important for SSC self-renewal, as SSC markers, or for SSC differentiation.

| Gene                             | -18 h <sup>c</sup> | 2 h <sup>c</sup> | 4 h <sup>c</sup> | 8 h <sup>c</sup> | Raw signal <sup>d</sup> |
|----------------------------------|--------------------|------------------|------------------|------------------|-------------------------|
| SSC Self-Renewal <sup>a,b</sup>  |                    |                  |                  |                  |                         |
| <i>Bcl6b</i> <sup>e</sup> [2]    | -9.56              | 2.32             | 4.03             | 3.83             | 1170.39                 |
| <i>Etv5</i> <sup>e</sup> [2]     | -1.46              | -1.09            | 1.46             | 1.42             | 765.94                  |
| <i>Fos</i> <sup>e</sup> [5]      | -1.17              | 2.55             | 1.43             | -1.02            | 1789.85                 |
| <i>Lhx1</i> [2]                  | -1.02              | 1.01             | 1.01             | 1.01             | 8.84                    |
| <i>Zbtb16</i> [6]                | -1.58              | -1.28            | -1.07            | 1.17             | 32.43                   |
| <i>Stat3</i> [7]                 | 1                  | 1.06             | 1.1              | -1.01            | 463.81                  |
| <i>Piwil2</i> [8]                | 1.1                | 1.06             | 1.02             | -1.01            | 1534.99                 |
| <i>Mycn</i> [9]                  | -1.01              | -1.03            | 1.00             | -1.07            | 862.41                  |
| <i>Pou5f1</i> <sup>f</sup> [10]  | -1.13              |                  | 1.27             |                  |                         |
| <i>Msi2</i> <sup>g</sup> [11]    | 1.12               | -1.01            | 1.23             | -1.12            | 272.74                  |
| <i>Ret</i> <sup>g</sup> [12]     | -1.1               | -1.39            | -1.98            | -1.38            | 2424.4                  |
| <i>Gfra1</i> <sup>g</sup> [12]   | 1.19               | 1.01             | -1.06            | 1.08             | 7.81                    |
| <i>Bmi1</i> <sup>g</sup> [13]    | 1.1                | -1.16            | -1.07            | -1.1             | 1493.95                 |
| SSC Markers                      |                    |                  |                  |                  |                         |
| <i>Tacstd1</i> <sup>e</sup> [1]  | -1.45              | 1.04             | 1.3              | 1.33             | 10993.7                 |
| <i>Itga6</i> <sup>e</sup> [14]   | -1.32              | -1.06            | -1.11            | 1                | 4517.49                 |
| <i>Thy1</i> [14]                 | -1.07              | 1.01             | -1.09            | 1                | 5.38                    |
| <i>Cd9</i> [15]                  | -1.29              | -1.02            | -1.11            | -1.03            | 6783.18                 |
| <i>Gpr125</i> <sup>g</sup> [16]  | 1.04               | -1.15            | -1.15            | -1.09            | 376.67                  |
| SSC differentiation <sup>h</sup> |                    |                  |                  |                  |                         |
| <i>Kit</i> <sup>g</sup> [17]     | 1.71               | -1.09            | -1.55            | -1.53            | 95.61                   |
| <i>Sohlh1</i> [18]               | -1.05              | 1.06             | 1.03             | -1.03            | 1489.99                 |

<sup>a</sup>Gene symbol (Gene name; Affymetrix probe set identification): *Bcl6b* (previously known as *Bazf*, B-cell CLL/lymphoma 6, member B; 1394375\_x\_at, 1386833\_at, 1386832\_a\_at, 1381804\_at), *Etv5* (previously known as *Erm*, ets variant 5; 1383447\_at), *Fos* (previously known as *c-fos*, FBJ osteosarcoma oncogene; 1375043\_at), *Lhx1* (LIM homeobox 1; 1389982\_at, 1377206\_at), *Zbtb16* (previously known as *Plzf*, zinc finger and BTB containing domain 16; 1381553\_at), *Stat3* (signal transducer and activator of transcription 3; 1370224\_at, 1371781\_at), *Piwil2* (piwi-like 2 (Drosophila); 1384745\_at), *Mycn* (previously known as *n-myc*, v-myc myelocytomatosis viral related oncogene, neuroblastoma derived (avian); 1376648\_at), *Pou5f1* (previously known as *Oct4*, POU class 5 homeobox 1), *Msi2* (Musashi homolog 2 (Drosophila); 1380541\_at, 1385427\_at, 1388870\_at, 1390813\_at), *Ret* (ret proto-oncogene; 1370989\_at, 1371112\_at, 1388208\_a\_at), *Gfra1* (GDNF family receptor alpha 1; 1367954\_at, 1387007\_at), *Bmi1* (Bmi1 polycomb ring finger oncogene; 1373568\_at), *Epcam* (previously known as *Tacstd1*, epithelial cell adhesion molecule; 1388199\_at), *Itga6* (integrin, alpha 6, 1383240\_at, 1393558\_at, 1371186\_at), *Thy1* (previously known as *CD90*, Thy-1 cell surface antigen; 1369651\_at), *Cd9* (CD9 molecule; 1371499\_at), *Gpr125* (G protein-coupled receptor 125; 1377679\_at, 1385807\_at), *Kit* (v-kit Hardy-Zuckerman 4 feline sarcoma viral oncogene homolog; 1369822\_at), *Sohlh1* (spermatogenesis and oogenesis specific basic helix-loop-helix 1; 1385654\_at).

<sup>b</sup>Additional putative SSC self-renewal genes: *Nanos3* (nanos homolog 3; 1397827\_at) was not expressed by the EPCAM+ clump forming germ cells [19]. *Msi1* (Musashi homolog 1 (Drosophila)) [11], *Taf4b* (TAF4B RNA polymerase II, TATA box binding protein (TBP)-associated factor) [20], and *Nanos2* (nanos homolog 2) [21] were not annotated on the array.

<sup>c</sup>Fold change in gene expression after GDNF withdrawal and replacement. -18 h represents the change in expression after an 18 hour GDNF withdrawal compared to before the withdrawal. 2 h, 4 h, and 8 h represent the change in gene expression level after GDNF was replaced for 2, 4, and 8 hours compared to the 18 hour withdrawal.

<sup>d</sup>Average of the raw signals of gene expression on the microarray of 3 replicates of rat EPCAM+ clump forming germ cells prior to GDNF withdrawal.

<sup>e</sup>Genes that were significantly up-regulated by GDNF.

<sup>f</sup>*Pou5f1* was not annotated on the array; however, gene expression was determined using qRT-PCR for time 0, 18 h GDNF withdrawal, and 4 hour GDNF replacement.

<sup>g</sup>Genes that were significantly down-regulated by GDNF.

<sup>h</sup>Additional putative SSC differentiation genes: *Neurog3* (neurogenin 3; 1369853\_at) [22] was not expressed by the EPCAM+ clump forming germ cells. *Stra8* (stimulated by retinoic acid gene 8) [23], *Sox3* (SRY(sex determining region Y)-box containing gene 3) [24], and *Dazl* (deleted in azoospermia-like) [25] were not annotated on the array.

Schmidt et al., SUPPLEMENTAL TABLE S6. Expression of genes in EPCAM+ clump forming germ cells that have been reported to be important for stem cell function in cells other than SSCs.

| Gene <sup>a,b</sup>        | Stem cell type <sup>c</sup> | -18 h <sup>d</sup> | 2 h <sup>d</sup> | 4 h <sup>d</sup> | 8 h <sup>d</sup> | Raw signal <sup>e</sup> |
|----------------------------|-----------------------------|--------------------|------------------|------------------|------------------|-------------------------|
| <i>Pou3f1</i> <sup>f</sup> | NSC, ESC [26]               | -1.19              | 1.42             | 2.11             | 1.37             | 163.58                  |
| <i>Egr1</i> <sup>f</sup>   | HSC [27]                    | -1.59              | 2.71             | 2.19             | 1.46             | 3595.19                 |
| <i>Id4</i> <sup>f</sup>    | NSC [28]                    | -1.23              | 1.44             | 1.36             | 1.33             | 38.31                   |
| <i>Tall1</i> <sup>f</sup>  | HSC [29]                    | -1.29              | 1.07             | 1.17             | 1.33             | 10.12                   |
| <i>Klf4</i> <sup>f</sup>   | ESC [30]                    | -1.09              | 1.53             | 1.28             | -1.03            | 354.48                  |
| <i>Stat3</i>               | ESC [31]                    | 1.0                | 1.06             | 1.1              | -1.01            | 463.8                   |
| <i>Pou5f1</i> <sup>g</sup> | ESC [10]                    | -1.13              |                  | 1.27             |                  |                         |
| <i>Nanog</i> <sup>g</sup>  | ESC [32]                    | -1.34              |                  | 1.09             |                  |                         |
| <i>Myc</i>                 | HSC [33]                    | -1.19              | 1.17             | 1.2              | 1.26             | 11.99                   |
| <i>Lin28</i>               | ESC [34]                    | -1.22              | -1.19            | 1.17             | 1.04             | 13.44                   |
| <i>Bmi1</i> <sup>h</sup>   | HSC [35]                    | 1.1                | -1.16            | -1.07            | -1.1             | 1493.95                 |

<sup>a</sup>Gene symbol (Gene name; Affymetrix probe set identification): *Pou3f1* (previously known as *Oct6*, POU class 3 homeobox 1; 1370432\_at), *Egr1* (early growth response 1; 1368321\_at), *Id4* (inhibitor of DNA binding 4; 1375120\_at), *Tall1* (T-cell acute lymphocytic leukemia 1; 1389342\_at), *Klf4* (Kruppel-like factor 4 (gut); 1387260\_at), *Stat3* (signal transducer and activator of transcription 3; 1370224\_at, 1371781\_at), *Pou5f1* (previously known as *Oct4*, POU class 5 homeobox 1), *Nanog* (nanog homeobox), *Myc* (myelocytomatosis oncogene; 1368308\_at), *Lin28* (lin-28 homolog (C. elegans); 1393904\_at), *Bmi1* (Bmi1 polycomb ring finger oncogene; 1373568\_at).

<sup>b</sup>Additional stem cell genes: *Sox2* (SRY (sex determining Y)-box 2, ESC [36]; 1381874\_at, 1375153\_at, 1379942\_at, 1389826\_at), *Dppa3* (previously known as *Stella*, developmental pluripotency-associated 3, ESC [37]), *Foxd3* (forkhead box D3, ESC [38]; 1393646\_at), and *Hoxb4* (homeobox B4, HSC [39]; 1386125\_at) were not expressed by the rat EPCAM+ clump forming germ cells. *Utf1* (undifferentiated embryonic cell transcription factor 1, ESC [40]) was not annotated on the array.

<sup>c</sup>NSC (Neuronal Stem Cell), ESC (Embryonic Stem Cell), HSC (Hematopoietic Stem Cell).

<sup>d</sup>Fold change in gene expression after GDNF withdrawal and replacement. -18 h represents the change in expression after an 18 hour GDNF withdrawal compared to before the withdrawal. 2 h, 4 h, and 8 h represent the change in gene expression level after GDNF was replaced for 2, 4, and 8 hours compared to the 18 hour withdrawal.

<sup>e</sup>Average of the raw signals of gene expression on the microarray of 3 replicates of rat EPCAM+ clump forming germ cells prior to GDNF withdrawal.

<sup>f</sup>Genes that were significantly up-regulated by GDNF.

<sup>g</sup>*Pou5f1* and *Nanog* were not annotated on the array; however, gene expression was determined using qRT-PCR.

<sup>h</sup>Genes that were significantly down-regulated by GDNF.

Schmidt et al., SUPPLEMENTAL TABLE S7. Expression of GDNF-regulated genes identified in mouse SSCs [2] in cultured rat EPCAM+ clump forming germ cells.<sup>a</sup>

| Gene <sup>b</sup>          | Mouse/Rat-GenBank No. | -18 h <sup>c</sup> | 2 h <sup>c</sup> | 4 h <sup>c</sup> | 8 h <sup>c</sup> |
|----------------------------|-----------------------|--------------------|------------------|------------------|------------------|
| <i>Bcl6b</i>               | Rat- XM_001079767     | -9.56              | 2.32             | 4.03             | 3.83             |
|                            | Mouse-NM_007528       | -6.23              | 2.28             | 2.82             | 3.89             |
| <i>Egr2</i>                | Rat- NM_053633        | -1.27              | 26.12            | 6.79             | 1.50             |
|                            | Mouse-NM_010118       | -5.81              | 4.20             | 5.25             | 3.76             |
| <i>Egr3</i>                | Rat-NM_017086         | -7.21              | 9.96             | 9.97             | 4.50             |
|                            | Mouse-NM_018781       | -3.64              | 8.26             | 11.2             | 3.61             |
| <i>Etv5</i>                | Rat- XM_221387        | -1.46              | -1.09            | 1.46             | 1.42             |
|                            | Mouse-NM_023794       | -3.32              | 2.11             | 2.82             | 2.43             |
| <i>Lhx1</i> <sup>d</sup>   | Rat-NM_145880         | -1.02              | 1.01             | 1.01             | 1.01             |
|                            | Mouse-NM_008498       | -3.94              | 2.11             | 2.82             | 2.43             |
| <i>Tspan8</i> <sup>e</sup> | Rat-NM_133526         | NP                 | NP               | NP               | NP               |
|                            | Mouse-NM_146010       | -5.92              | 2.2              | 2.26             | 2.83             |

<sup>a</sup>Data for the fold change of expression of GDNF-regulated genes identified in mouse germ cell clumps was reported previously [2].

<sup>b</sup>*Bcl6b* (previously known as *Bazf*, B-cell CLL/lymphoma6, member B), *Egr2* (early growth response 2), *Egr3* (early growth response 3), *Etv5* (previously known as *Erm*, ets variant 5), *Lhx1* (LIM homeobox 1), *Tspan8* (tetraspanin 8).

<sup>c</sup>Fold change in gene expression after GDNF withdrawal and replacement. -18 h represents the change in expression after an 18 h GDNF withdrawal compared to before the withdrawal. 2 h, 4 h, and 8 h represent the change in gene expression level after GDNF was replaced for 2, 4, and 8 h compared to the 18 h withdrawal.

<sup>d</sup>*Lhx1* expression in rat EPCAM+ clump forming germ cells was not GDNF-regulated.

<sup>e</sup>*Tspan8* was not expressed by rat EPCAM+ clump forming germ cells. NP: Not Present.
