# Supplementary material
Source: PubMed Central journal article supplement (PMC3093986)

Supplemental Figure 1; Schmidt et al

A

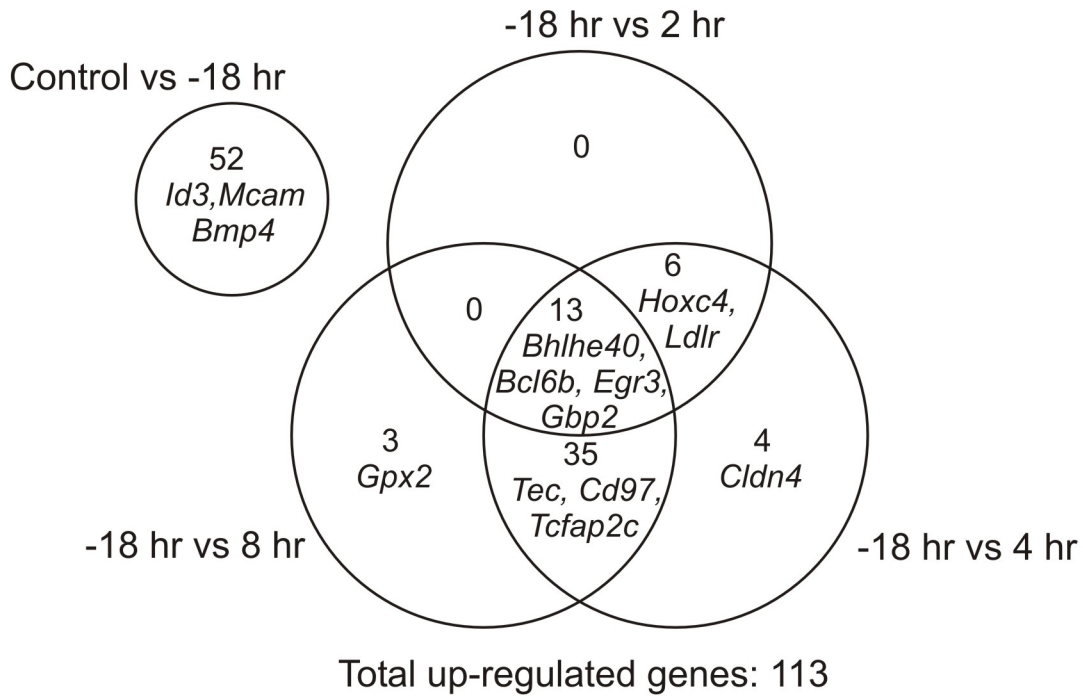

B

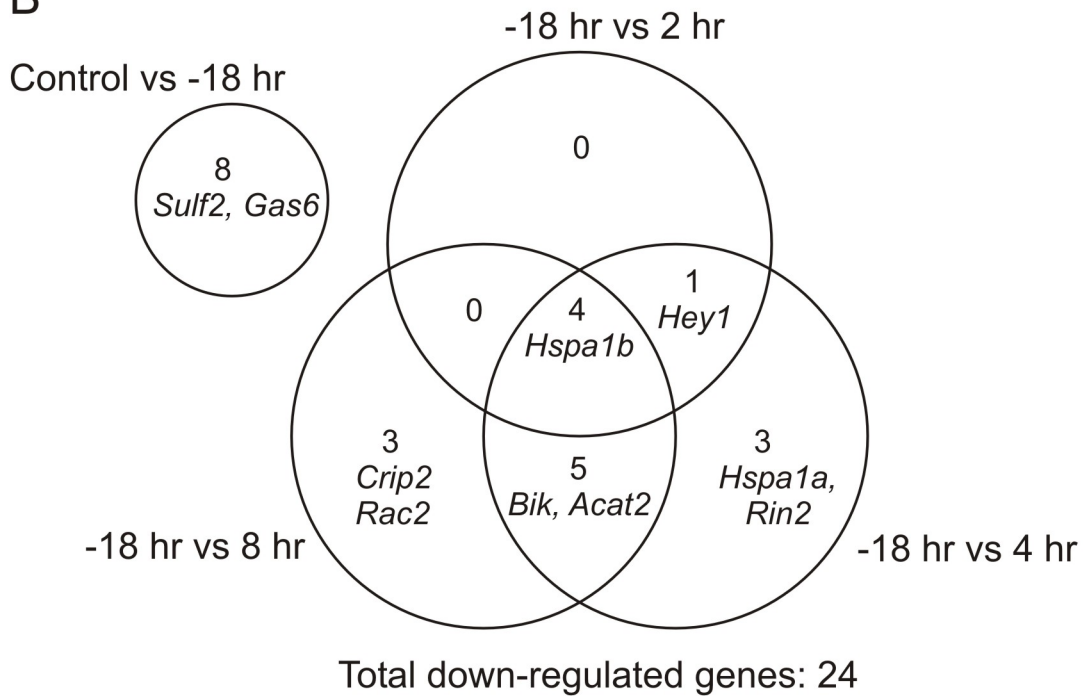

Supplemental Figure 2; Schmidt et al

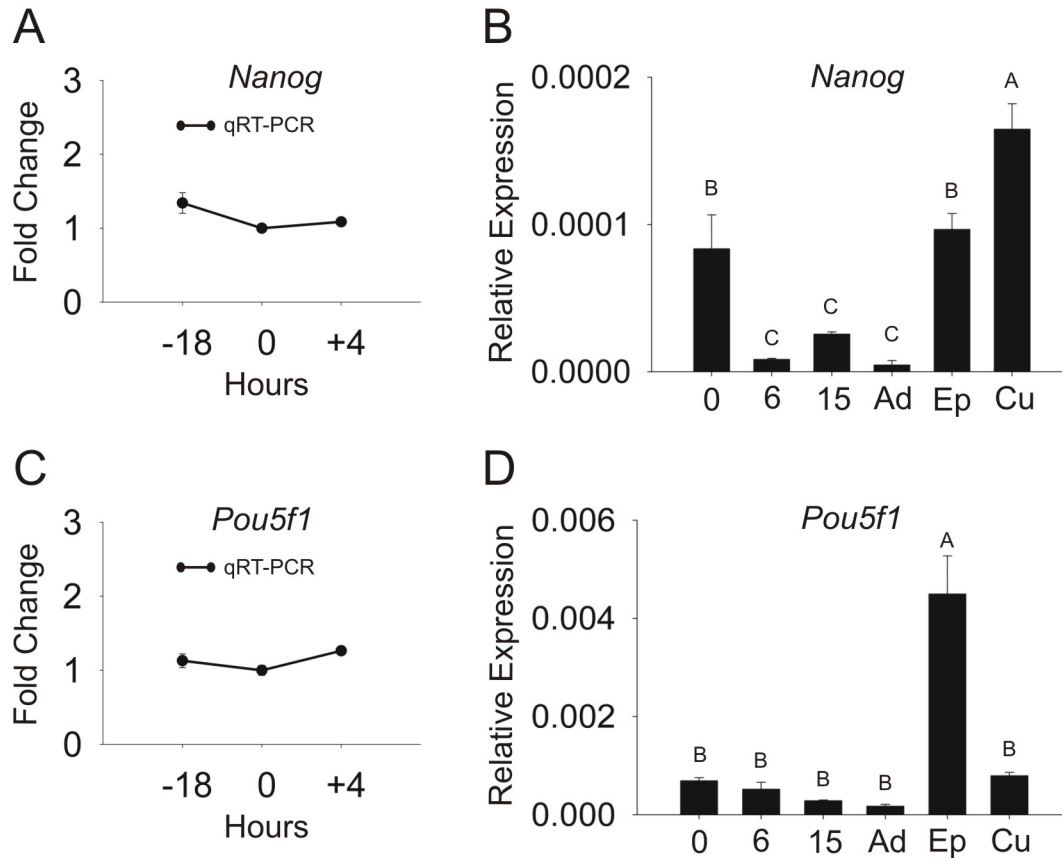

Supplemental Figure 3; Schmidt et al

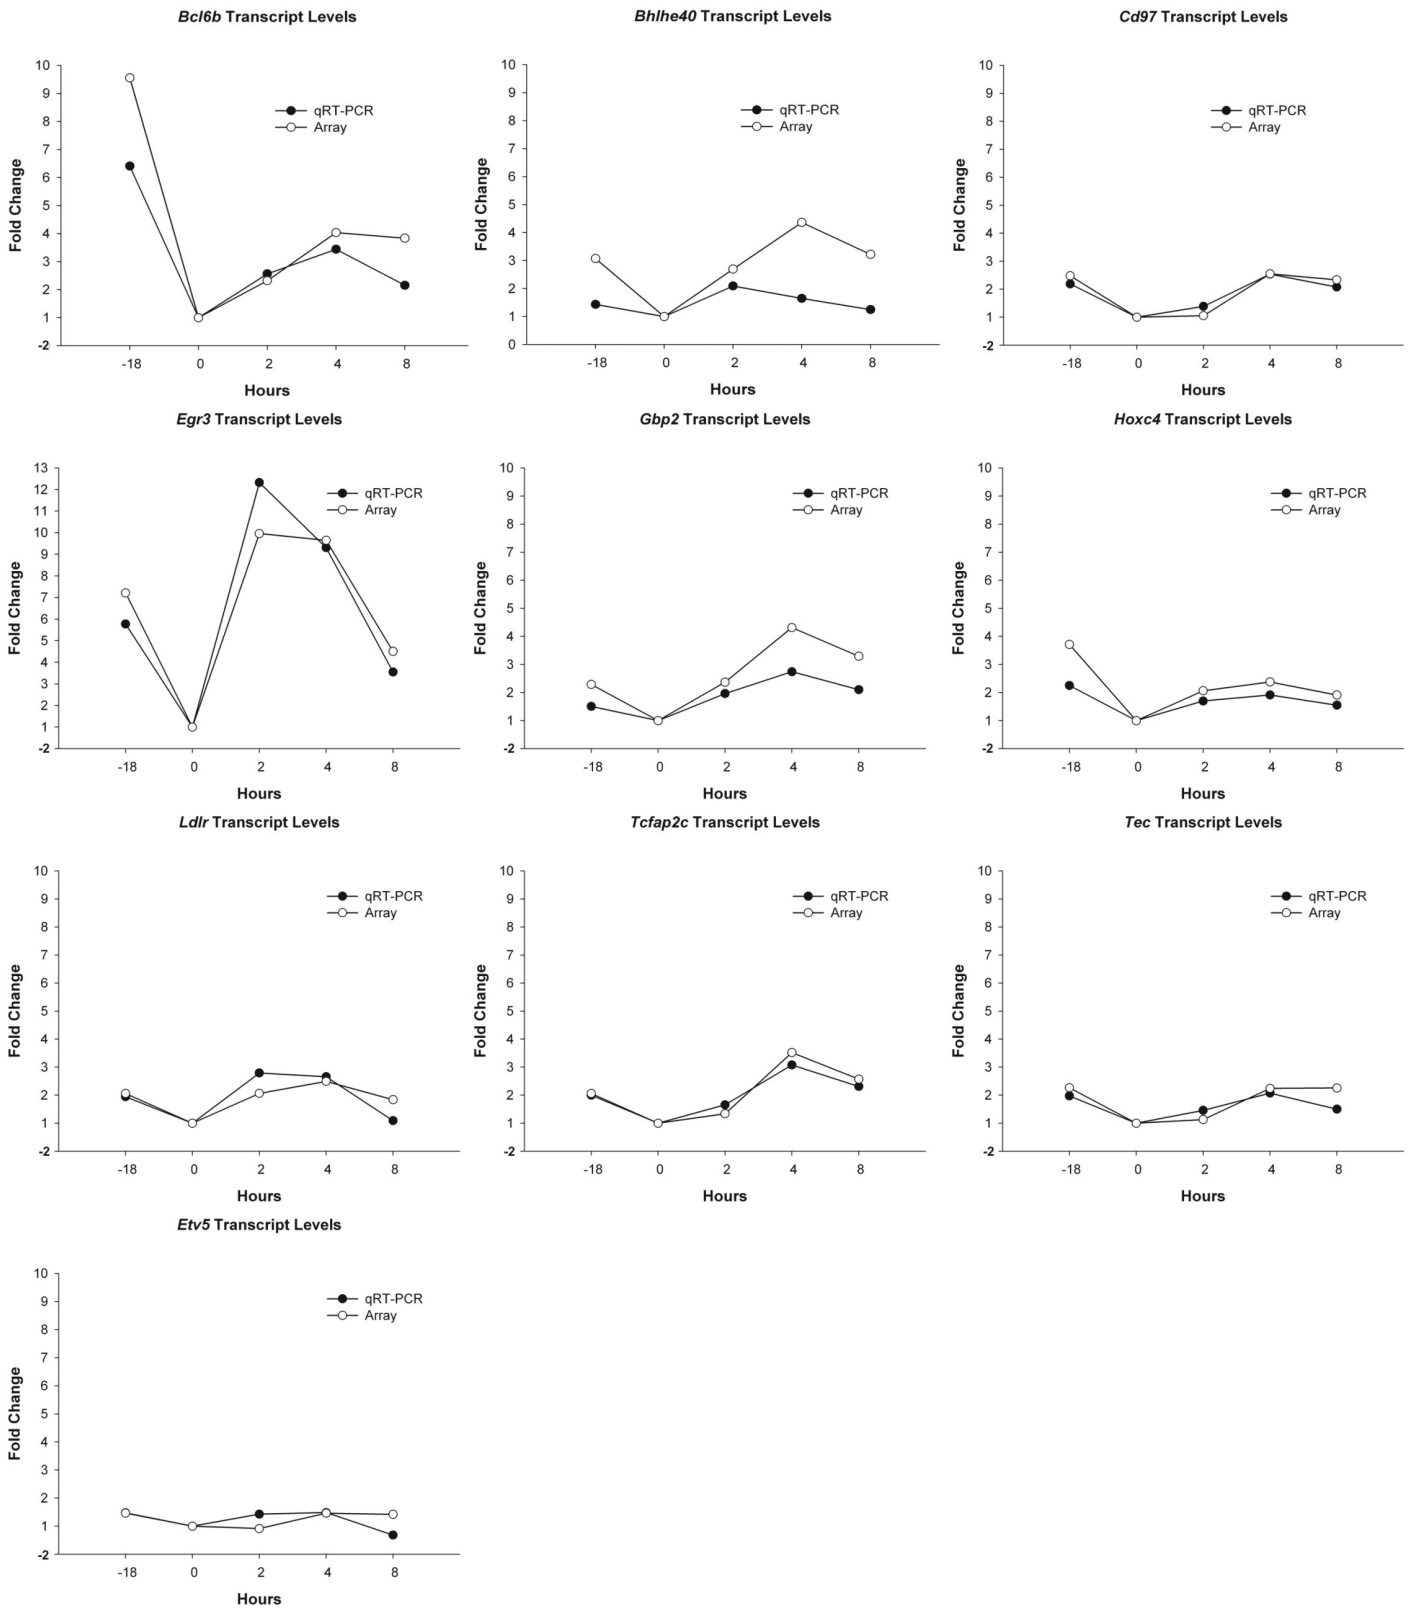

Supplemental Figure 4; Schmidt et al

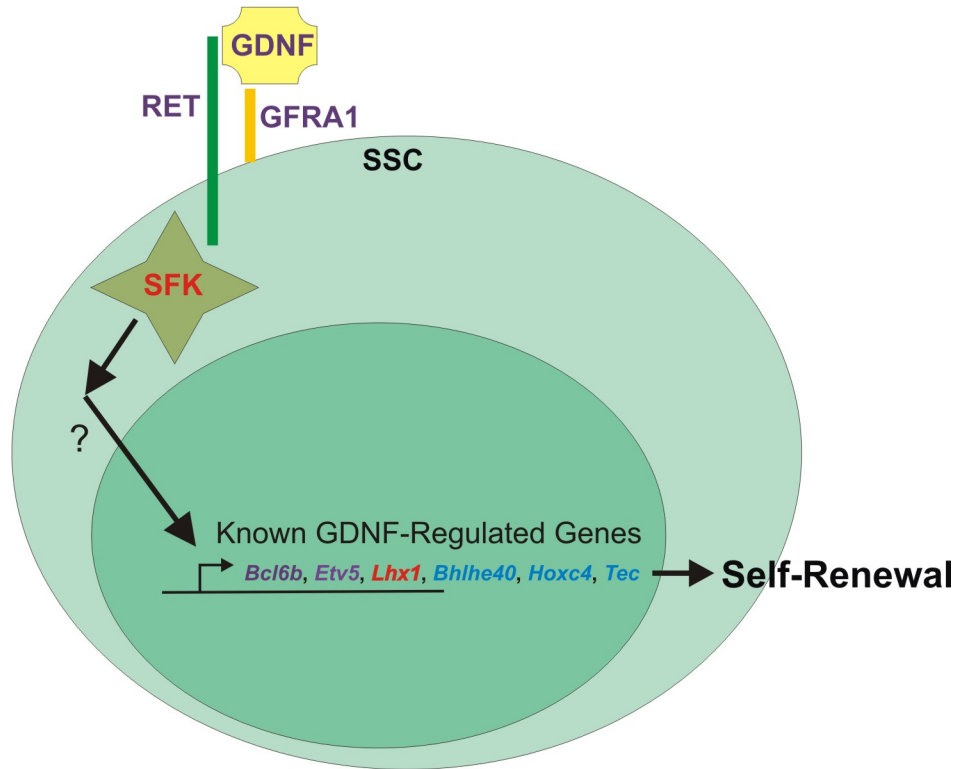

Supplement: supp_108.075358_biolreprod.108.075358-3.pdf [file supp_108.075358_biolreprod.108.075358-3.pdf]
